# Supplementary material for: Synthesis and characterization of cellulose derivative-based hybrid beads as chiral stationary phases for efficient chromatographic enantioseparation
Source: Royal Society of Chemistry journal article supplement (doi:10.1039/d0nj05094f), 2021-01-01
Supplement: d0nj05094f1.pdf [file d0nj05094f1.pdf]

**Synthesis and characterization of cellulose derivative-based hybrid beads as chiral stationary  
phases for efficient chromatographic enantioseparation**

Geng Li<sup>a#</sup>, Xiao Dai<sup>a#</sup>, Yixuan Min<sup>a</sup>, Lili Zhang<sup>a\*</sup>, Jun Shen<sup>a\*</sup>, Yoshio Okamoto<sup>a,b</sup>

*<sup>a</sup>Polymer Materials Research Center, Key Laboratory of Superlight Materials and Surface  
Technology, Ministry of Education, College of Materials Science and Chemical Engineering,  
Harbin Engineering University, Harbin 150001, China*

*<sup>b</sup>Nagoya University, Furo-cho, Chikusa-ku, Nagoya 464-8603, Japan*

The 16-digit ORCID of Jun Shen: 0000-0002-9976-4849

The 16-digit ORCID of Yoshio Okamoto: 0000-0002-4542-6772

\* To whom correspondence should be addressed.

Dr. Lili Zhang, 86-451-82569890 (Tel), Email: [zhanglili1984@hrbeu.edu.cn](mailto:zhanglili1984@hrbeu.edu.cn)

Prof. Jun Shen, 86-451-82569890 (Tel), Email: [shenjun@hrbeu.edu.cn](mailto:shenjun@hrbeu.edu.cn)

# These authors contribute equally to this work.

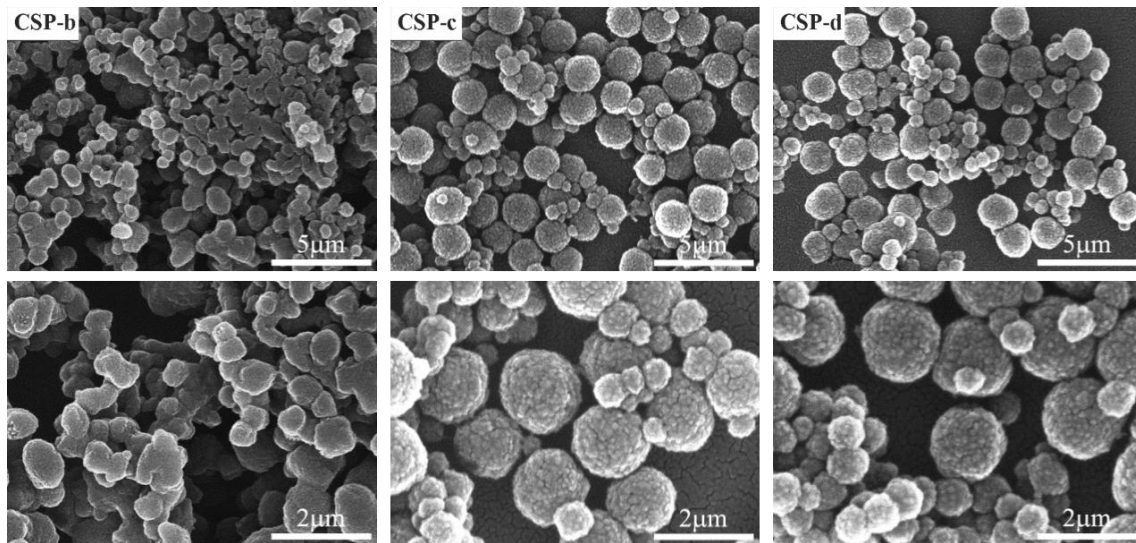

**Fig. S1.** SEM images of hybrid bead-type CSPs (CSPs-b–d).

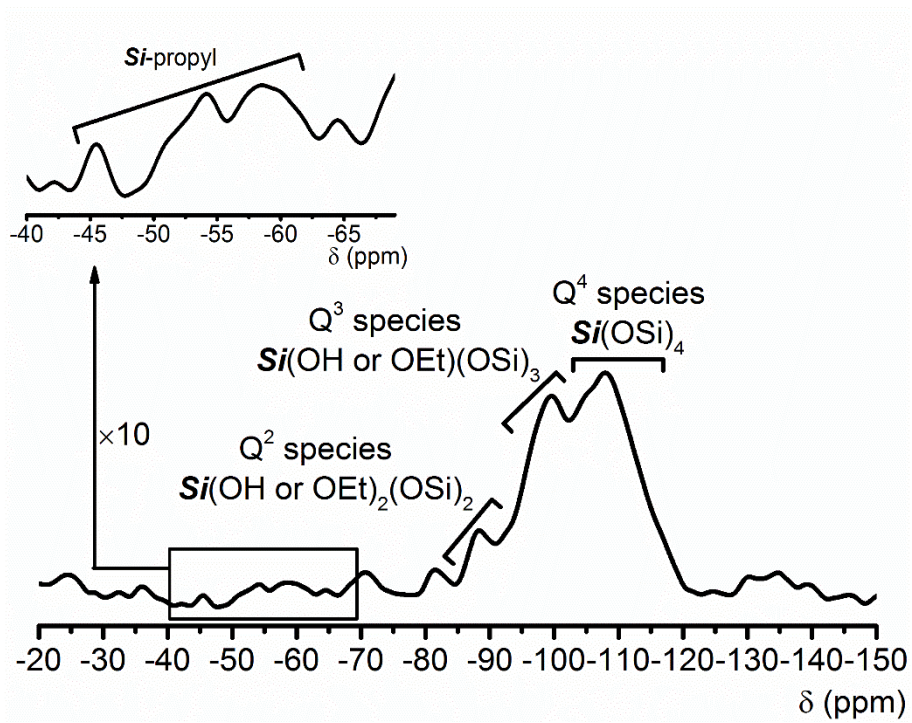

**Fig. S2.** Solid-state  $^{29}\text{Si}$  CP/MAS NMR spectrum of hybrid bead-type CSP-a.
